# Supplementary material
Source: publisher site journal article supplement (https://www.spandidos-publications.com/8391/downloadSupplementary)
Supplement: Supplementary file 1 [file downloadSupplementary]

Table SI. Distribution of hypoxic and normoxic CAFs across single-cell clusters.

| Cluster | Hypoxic CAF counts | Normoxic CAF counts |
|---------|--------------------|---------------------|
| 1       | 2,520              | 144                 |
| 2       | 1,425              | 601                 |
| 3       | 1,529              | 253                 |
| 4       | 1,387              | 23                  |
| 5       | 1161               | 0                   |
| 6       | 1095               | 0                   |
| 7       | 1057               | 23                  |
| 8       | 1045               | 20                  |
| 9       | 894                | 149                 |
| 10      | 725                | 189                 |
| 11      | 303                | 546                 |
| 12      | 465                | 250                 |
| 13      | 38                 | 571                 |
| 14      | 54                 | 549                 |
| 15      | 11                 | 261                 |

CAF, cancer-associated fibroblast.

Table SII. Overlapping 59 genes that were upregulated in both hypoxic cancer-associated fibroblast and hypoxic HCT116 and HT29.

| Gene name | Fold Change | Fold Change |
|-----------|-------------|-------------|
| SNORA29   | 742.34      | 660.167     |
| SNORA7B   | 126.911     | 483.696     |
| SNORA46   | 140.782     | 429.25      |
| SNORA55   | 267.225     | 305.544     |
| SLC2A3    | 983.099     | 112.657     |
| KRT17     | 52.21       | 100.013     |
| IFNL2     | 22.022      | 97.667      |
| CA9       | 32.125      | 84.076      |
| XAF1      | 24.903      | 76.619      |
| NDRG1     | 1836.26     | 75.708      |
| IFNL3     | 10.84       | 59.795      |
| ANGPTL4   | 17.288      | 48.286      |
| CREB5     | 15.479      | 43.58       |
| CTGF      | 8.468       | 41.774      |
| IFI27     | 13.459      | 40.478      |
| ANKRD37   | 8.538       | 39.047      |
| IFI44L    | 20.769      | 38.652      |
| DUSP10    | 40.739      | 37.039      |
| EDN2      | 238.164     | 32.916      |
| TNFAIP3   | 19.486      | 30.364      |
| IFITM1    | 30.086      | 29.854      |
| ETS1      | 18.4        | 27.426      |
| BCL6      | 9.863       | 27.221      |
| KDM3A     | 31.055      | 25.521      |
| GBP1      | 14.761      | 25.089      |
| IL1RAP    | 30.713      | 24.107      |
| PDK1      | 12.989      | 24.009      |
| PFKFB4    | 28.44       | 23.408      |
| PCAT6     | 32.217      | 20.981      |
| RSAD2     | 15.765      | 20.141      |
| CPEB2     | 22.972      | 20.054      |
| EPSTI1    | 22.972      | 20.054      |

|              |         |        |
|--------------|---------|--------|
| P4HA1        | 15.954  | 19.536 |
| SUMO4        | 17.959  | 18.566 |
| PAG1         | 13.152  | 18.378 |
| BNIP3L       | 10.06   | 18.067 |
| IFI16        | 24.382  | 17.802 |
| HIST1H2AK    | 44.594  | 16.575 |
| REC8         | 16.51   | 15.731 |
| GPR146       | 8.992   | 15.496 |
| DBP          | 11.36   | 15.036 |
| MX1          | 32.945  | 14.48  |
| SEPP1        | 8.573   | 13.824 |
| ALDOC        | 108.415 | 13.791 |
| MMP28        | 40.118  | 13.56  |
| ABL2         | 23.483  | 13.502 |
| KRT16        | 16.007  | 12.957 |
| PTHLH        | 49.919  | 12.798 |
| OAS2         | 8.496   | 12.626 |
| CYP2E1       | 14.14   | 12.341 |
| UCA1         | 13.088  | 12.239 |
| TNNT2        | 12.096  | 12.147 |
| PPP1R3B      | 18.833  | 11.875 |
| PPFIA4       | 21.091  | 11.799 |
| LMO7-AS1     | 43.98   | 11.637 |
| HIST1H3E     | 10.636  | 11.599 |
| RBM5-AS1     | 15.195  | 11.539 |
| EGLN3        | 8.491   | 11.129 |
| BHLHE40      | 25.594  | 10.999 |
| LOC100507291 | 260.817 | 10.975 |
| UBA7         | 12.122  | 10.934 |
| NFATC2       | 16.093  | 10.715 |
| HIST1H2BM    | 43.641  | 9.98   |
| KLHL24       | 31.357  | 9.81   |
| GEM          | 30.773  | 9.804  |
| IL32         | 24.406  | 9.69   |
| OVGP1        | 9.455   | 9.643  |
| RNF103-CHMP3 | 15.636  | 9.614  |

|              |          |       |
|--------------|----------|-------|
| DDIT3        | 21.247   | 9.532 |
| CFB          | 22.435   | 9.441 |
| CAND1.11     | 14.341   | 9.441 |
| PLOD2        | 35.063   | 9.236 |
| LRP1         | 9.409    | 9.089 |
| NDUFA4L2     | 2008.541 | 8.975 |
| AHNAK2       | 20.183   | 8.915 |
| KRTAP5-2     | 10.465   | 8.864 |
| TCP11L2      | 24.6     | 8.823 |
| DUSP5        | 18.774   | 8.761 |
| FERMT2       | 12.504   | 8.73  |
| CREBRF       | 71.256   | 8.703 |
| OPTN         | 9.589    | 8.681 |
| ADM          | 54.172   | 8.554 |
| ISG20        | 23.981   | 8.548 |
| NDNF         | 38.713   | 8.518 |
| RPS15AP10    | 16.642   | 8.392 |
| C7orf61      | 8.357    | 8.392 |
| LOC100129617 | 16.111   | 8.392 |
| HIST2H2BE    | 14.648   | 8.287 |
| MIR210HG     | 41.143   | 8.28  |
| LSMEM1       | 9.571    | 8.095 |
| BTG1         | 9.842    | 8.039 |

Gene name (59 genes)

SLC2A3

CA9

XAF1

ANGPTL4

CREB5

CTGF

IFI27

ANKRD37

DUSP10

TNFAIP3

KRT16

IFITM1

BCL6  
KDM3A  
GBP1  
IL1RAP  
PFKFB4  
PCAT6  
CPEB2  
EPSTI1  
P4HA1  
GEM  
SUMO4  
PAG1  
BNIP3L  
IFI16  
REC8  
GPR146  
DBP  
ALDOC  
MMP28  
ABL2  
FERMT2

---

Table SIII. Details of RAS mutations, including KRAS and NRAS.

|                | RAS mutation    |               |
|----------------|-----------------|---------------|
|                | Immature (n=10) | Mature (n=11) |
| KRAS, n        |                 |               |
| G12D/G12V      | 6/3             | 2/4           |
| G13A/G13D/G13R | 0               | 1/2/1         |
| K117N          | 0               | 1             |
| NRAS, n        |                 |               |
| Q61K           | 1               | 0             |

RAS, rat sarcoma oncogene; KRAS, Kirsten rat sarcoma viral oncogene homolog; NRAS, neuroblastoma RAS viral oncogene homolog.
